# Supplementary material for: Like Father, Like Child? Paternal Age at Birth and Offspring’s Facial Asymmetry and Distinctiveness
Source: MDPI journal article supplement (doi:10.3390/sym14020344), 2022-02-08
Supplement: s1 [file s1]

Archive with 2 entries (2 files):
- ESM_1.pdf
- ESM_2.xlsx
