# Supplementary material for: Like Father, Like Child? Paternal Age at Birth and Offspring’s Facial Asymmetry and Distinctiveness
Source: MDPI journal article supplement (doi:10.3390/sym14020344), 2022-02-08
Supplement: s1 [file s1 › ESM_1.pdf]

## Electronic Supplementary Materials

### Like father, like child? Paternal age at birth and offspring's facial asymmetry and distinctiveness

Magdalena Klimek, Urszula M. Marcinkowska, Pawel Fedurek, Karel Kleisner, Dariusz P. Danel

**Figure S1.** Positions of landmarks and semilandmarks on a face. Landmarks are marked as white filled circles and semilandmarks as black circles.

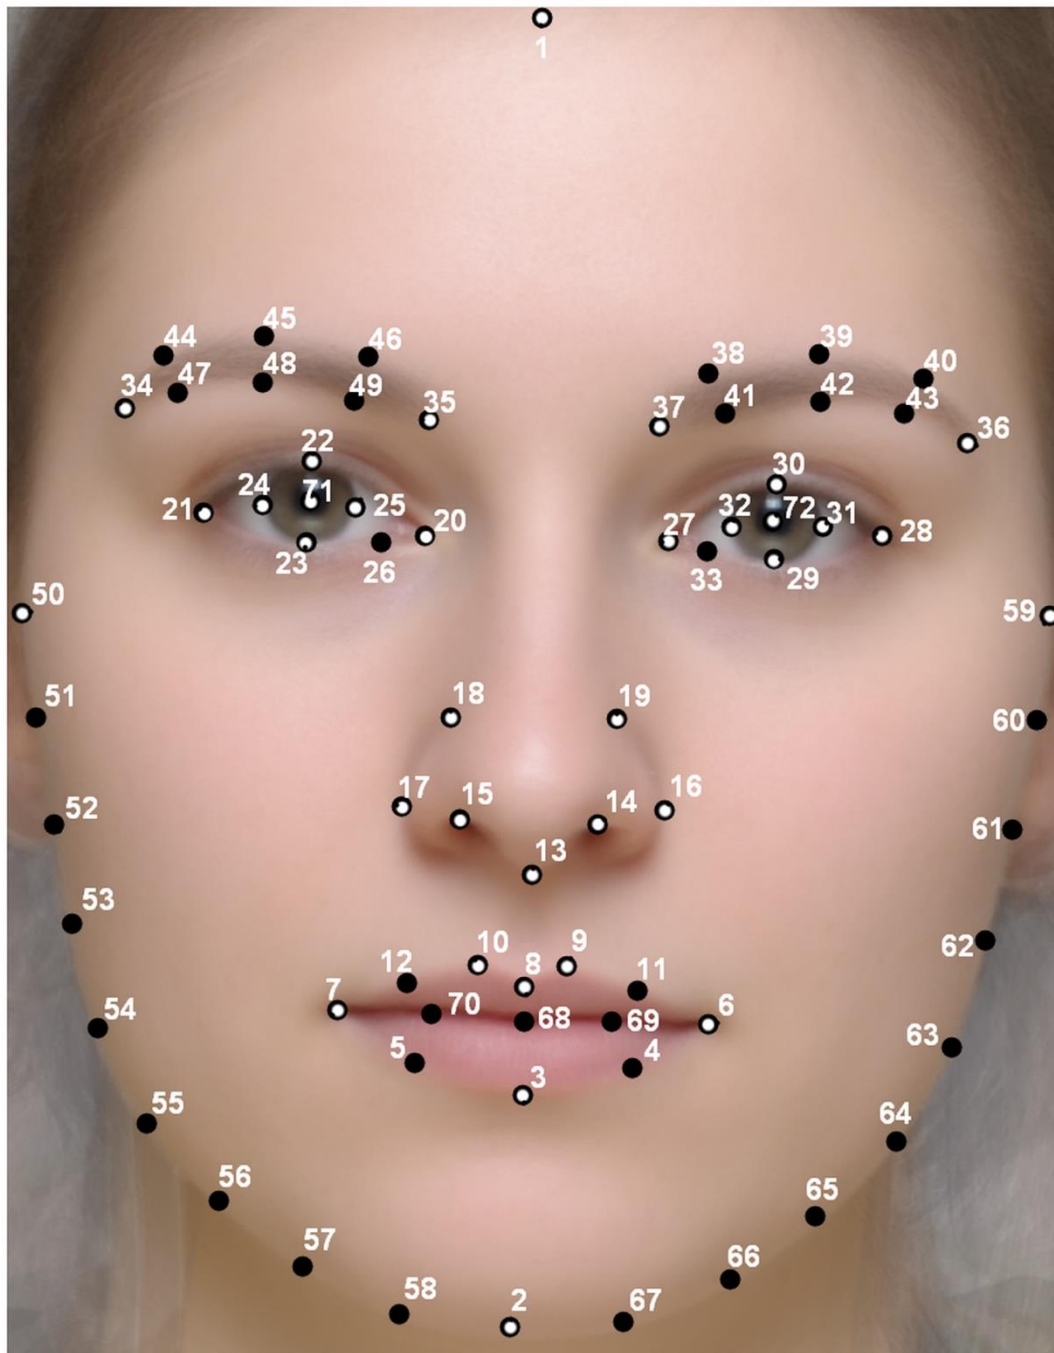

**Table S1.** The location of each selected landmark on the facial photographs.

|             |                         |                                                                                                                              |
|-------------|-------------------------|------------------------------------------------------------------------------------------------------------------------------|
| 1           | TRICHION                | midpoint of the hairline, that is, on the hairline through the midline of the forehead                                       |
| 2           | MENTON                  | the lowest point of the lower border of the mandible (along the jaw line)                                                    |
| 3           | LABIALE INFERIUS        | the midline point of the lower vermilion line (border of the lower lip)                                                      |
| 4,5         |                         | the midpoints between LABIALE INFERIUS (3) and CHEILON (9,10)                                                                |
| 6,7         | CHEILON                 | the outer corner of the mouth where the outer edges of the upper and lower lip meet                                          |
| 8           | LABIALE SUPERIUS        | the upper midpoint of the upper vermilion line, a point of maximum local curvature between the christae philtri              |
| 9,10        | CHRISTA PHILTRI         | the point on the crest of the philtrum, the vertical groove in the median portion of the upper lip on the vermilion border   |
| 11,12       |                         | the midpoints between LABIALE SUPERIUS (8) and CHRISTA PHILTRI (9,10)                                                        |
| 13          | SUBNASALE               | midpoint of the angle at the columella base where the lower border of the nasal septum and the surface of the upper lip meet |
| 14,15       | COLUMELLA APEX          | highest point of the columella crest at the apex of the nostril                                                              |
| 16,17       | ALARE                   | the most lateral point on the ala contour                                                                                    |
| 18,19       | ALAE ORIGIN             | the most posterolateral point of the curvature of the base of the nasal alae                                                 |
| 20,27       | ENDOCANTHION            | the inner corner of the eye fissure where eyelids meet                                                                       |
| 21,28       | EXOCANTHION             | the outer corner of the eye fissure where eyelids meet                                                                       |
| 22,30       | PALPEBRALE SUPERIUS     | the highest visible point of the iris                                                                                        |
| 23,29       | PALPEBRALE INFERIUS     | the lowest visible point of the iris                                                                                         |
| 24,31       | Iris Outer Border       | the rightmost point of the right iris (leftmost of the left iris)                                                            |
| 25,32       | Iris Inner Border       | the leftmost point of the right iris (rightmost of the left iris)                                                            |
| 26,33       |                         | the midpoint between ENDOCANTHION (20,27) and PALPEBRALE INFERIUS (23,29)                                                    |
| 34,36       | SUPERCILIARE LATERALE   | the most lateral point of the eyebrow                                                                                        |
| 35,37       | SUPERCILIARE MEDIALE    | the most medial point of the eyebrow                                                                                         |
| 38-40,44-46 | the eyebrow upper curve | three semilandmarks with regular spacing between SUPERCILIARE LATERALE (34,36) and SUPERCILIARE MEDIALE (35,37)              |
| 41-43,47-49 | the eyebrow lower curve | three semilandmarks with regular spacing between SUPERCILIARE LATERALE (34,36) and SUPERCILIARE MEDIALE (35,37)              |
| 50,59       | ZYGION                  | the most lateral point of the zygomatic arch                                                                                 |
| 51-58,60-67 | the lower jaw           | eight semilandmarks with regular spacing between MENTON (2) and ZYGION (50,59)                                               |
| 68          | STOMION                 | center of the lip crack, lying on the midline between LABIALE SUPERIUS (8) and LABIALE INFERIUS (3)                          |
| 69,70       |                         | the midpoints between STOMION (68) and CHEILON (6,7)                                                                         |
| 71,72       | Pupil                   | center of the pupil                                                                                                          |
