# Supplementary material for: Like Father, Like Child? Paternal Age at Birth and Offspring’s Facial Asymmetry and Distinctiveness
Source: MDPI journal article supplement (doi:10.3390/sym14020344), 2022-02-08
Supplement: s1 [file s1 › ESM_2.xlsx]

## Sheet: Sheet1
id	distinctiveness	asymmetry	Age	Sex	BirthOrder	MAB	PAB	ID_family		Sex
1	0.0562251	0.0516428	14.803	0	2	23.504	29.134	1		1 - son
2	0.0663203	0.0466536	16.291	1	1	22.016	27.646	1		0 - daughter
3	0.0564066	0.040586	13.085	1	3	25.222	30.852	1
4	0.0595947	0.0521543	13.444	0	5	41.18	54.254	10		MAB
5	0.0520721	0.0411961	18.433	1	3	36.191	49.265	10		Maternal age at birth
6	0.0519808	0.0364759	3.498	0	3	28.428	38.203	11
7	0.0659846	0.0789356	9.038	1	1	22.888	33.663	11		PAB
8	0.053378	0.0771769	7.54	1	2	24.386	36.161	11		Paternal age at birth
9	0.0505044	0.0517347	18.636	0	1	25.419	29.893	12
10	0.0510434	0.0472429	15.852	0	2	28.203	32.677	12
11	0.0463253	0.034398	14.485	1	3	29.57	34.044	12
12	0.0537652	0.0713826	6.414	0	3	27.616	30.581	14
13	0.0370525	0.04106	13.156	1	1	20.874	23.839	14
14	0.0481805	0.0659128	10.433	1	2	23.597	26.562	14
15	0.0609959	0.0375729	11.545	1	1	21.091	23.995	15
16	0.0791322	0.077539	7.841	1	2	24.795	27.699	15
17	0.0613553	0.0799301	13.827	0	1	23.562	23.732	17
18	0.0539436	0.0428045	12.227	0	2	26.162	25.332	17
19	0.120594	0.0842406	8.34	1	3	31.049	29.219	17
20	0.0569272	0.0508729	18.337	0	1	26.285	26.274	18
21	0.0498129	0.0577552	13.389	0	3	31.233	31.222	18
22	0.0423529	0.0337309	16.093	1	2	28.529	28.518	18
23	0.0511888	0.0772468	14.236	0	1	22.003	24.186	19
24	0.0402515	0.0461843	9.376	0	2	26.863	29.046	19
25	0.0592469	0.0646494	7.14	0	3	29.099	31.282	19
26	0.0570704	0.0578386	12.921	1	1	17.814	30.214	2
27	0.0662079	0.0830739	10.556	1	2	20.179	32.579	2
28	0.0701868	0.0471437	5.965	1	3	24.77	37.17	2
29	0.0705679	0.036704	17.718	0	1	22.46	23.732	20
30	0.0614028	0.0438926	10.452	0	4	29.726	30.998	20
31	0.0540964	0.0630409	15.304	1	2	24.874	26.146	20
32	0.0792747	0.0505975	13.132	1	3	27.046	28.318	20
33	0.0617133	0.0391257	6.62	0	4	36.098	33.558	21
34	0.0567303	0.0644068	21.236	1	1	21.482	18.942	21
35	0.053755	0.0439717	18.726	1	2	23.992	21.452	21
36	0.066039	0.0693624	17.392	1	3	25.326	22.786	21
37	0.0443086	0.0368014	16.88	0	2	18.885	24.287	22
38	0.0470205	0.0472432	12.124	0	4	23.641	29.043	22
39	0.0473627	0.0410658	5.455	0	6	30.31	35.712	22
40	0.0526574	0.057282	14.45	1	3	21.315	26.717	22
41	0.0903901	0.0882184	10.438	0	1	23.156	23.992	23
42	0.0525119	0.0817093	9.09	0	2	24.504	25.34	23
43	0.0494463	0.0343648	6.594	1	3	27	27.836	23
44	0.0484858	0.066617	7.822	0	3	27.633	34.293	24
45	0.0557654	0.0597234	14.935	1	1	20.52	27.18	24
46	0.055556	0.0492894	9.537	1	2	25.918	32.578	24
47	0.0851669	0.120192	4.852	0	3	34.491	34.992	25
48	0.0784134	0.0460977	10.384	1	1	28.959	29.46	25
49	0.0493906	0.065225	8.507	1	2	30.836	31.337	25
50	0.0557791	0.0557754	14.712	1	1	23.285	26.71	26
51	0.0669592	0.0422922	11.811	1	2	26.186	29.611	26
52	0.0642624	0.0750669	8.874	1	3	29.123	32.548	26
53	0.0346256	0.0399565	7.669	0	4	32.298	31.994	27
54	0.0496072	0.0327429	14.638	1	1	25.329	25.025	27
55	0.0624669	0.0661533	12.789	1	2	27.178	26.874	27
56	0.0573153	0.0532681	9.691	1	3	30.276	29.972	27
57	0.0605357	0.0387946	16.444	1	1	25.159	26.781	28
58	0.0601542	0.0666539	15.584	1	2	26.019	27.641	28
59	0.0794308	0.109643	12.277	1	3	29.326	30.948	28
60	0.0541149	0.0647721	10.699	1	4	30.904	32.526	28
61	0.0496606	0.0788847	17.871	0	1	21.772	30.381	29
62	0.0571368	0.0725159	16.83	0	2	22.813	31.422	29
63	0.0468289	0.0521959	14.739	0	3	24.904	33.513	29
64	0.055761	0.0413321	12.63	0	4	27.013	35.622	29
65	0.0419338	0.043905	9.052	1	5	30.591	39.2	29
66	0.0355752	0.0430396	7.663	0	3	30.258	34.518	30
67	0.0962069	0.101576	15.263	1	1	22.658	26.918	30
68	0.0576028	0.0476307	12.118	1	2	25.803	30.063	30
69	0.0451798	0.0546191	8.663	0	1	21.142	21.306	31
70	0.0512166	0.0731646	4.309	0	3	25.496	25.66	31
71	0.0560571	0.0430148	5.887	1	2	23.918	24.082	31
72	0.0525473	0.0578161	16.386	0	2	22.699	31.732	33
73	0.0555092	0.0670626	7.912	0	4	31.173	41.206	33
74	0.0265615	0.0322372	14.468	1	3	24.617	35.65	33
75	0.0534818	0.0558417	14.762	0	3	23.022	32.567	34
76	0.0489435	0.0460342	17.959	1	1	19.825	29.37	34
77	0.0596815	0.0673805	16.702	1	2	21.082	30.627	34
78	0.0509058	0.0544766	12.444	1	4	25.34	34.885	34
79	0.0506987	0.0508878	20	0	1	23.028	25.841	35
80	0.0551935	0.0590812	14.912	0	3	28.116	30.929	36
81	0.0801718	0.0441604	12.575	1	4	30.453	33.266	35
82	0.0869951	0.0540468	3.962	1	5	39.066	41.879	35
83	0.0620191	0.0722923	16.296	0	2	29.814	29.644	38
84	0.0531579	0.0560249	18.386	1	1	27.724	27.554	38
85	0.0803907	0.0633246	3.641	1	3	42.469	42.299	38
86	0.0615936	0.0427549	13.838	0	1	20.472	19.154	39
87	0.0509062	0.0595746	11.833	0	2	22.477	21.159	39
88	0.127395	0.105852	7.814	1	3	26.496	25.178	39
89	0.0620924	0.0762395	5.389	1	4	28.921	27.603	39
90	0.0735183	0.106874	15.419	0	1	19.224	20.337	4
91	0.0535459	0.065981	13.09	0	2	21.553	22.666	4
92	0.0540796	0.0703655	10.947	0	3	23.696	24.809	4
93	0.0591851	0.0761703	11.18	0	1	27.409	23.231	40
94	0.0370409	0.0556803	9.767	0	2	28.822	24.644	40
95	0.0684886	0.0817661	4.767	0	3	33.822	29.644	40
96	0.0768681	0.0577288	4.934	0	5	31.468	29.775	41
97	0.0635611	0.0397409	14.013	1	1	22.389	20.696	41
98	0.058416	0.0613076	12.348	1	2	24.054	22.361	41
99	0.0874864	0.0811005	10.419	1	3	25.983	24.29	41
100	0.086169	0.0987599	6.767	1	4	29.635	27.942	41
101	0.0500786	0.0849743	12.641	0	1	23.038	22.479	42
102	0.077524	0.0583102	10.997	0	2	24.682	24.123	42
103	0.0472081	0.053094	5.83	0	3	29.849	29.29	42
104	0.0824883	0.0602824	3.013	0	4	32.666	32.107	42
105	0.0454162	0.0492663	16.86	0	2	27.381	32.605	43
106	0.038021	0.0535238	13.926	0	3	30.315	35.539	43
107	0.0746059	0.0715173	8.8	0	5	35.441	40.665	43
108	0.0550068	0.0512288	11.882	1	4	32.359	37.583	43
109	0.0565046	0.0586786	7.517	1	6	36.724	41.948	43
110	0.0656645	0.0468711	21.556	1	1	29.797	40.268	44
111	0.0857313	0.0662494	17.854	1	2	33.499	43.97	44
112	0.0549054	0.0481314	15.337	1	3	36.016	46.487	44
113	0.0549133	0.0411398	14.197	0	1	20.784	25.677	46
114	0.0562068	0.0379674	12.797	0	2	22.184	27.077	46
115	0.0390996	0.0384075	11.417	0	3	23.564	28.457	46
116	0.0612236	0.045277	14.406	0	1	25.687	27.876	47
117	0.0627533	0.0587898	3.737	0	3	36.356	38.545	47
118	0.0674897	0.113471	11.989	1	2	28.104	30.293	47
119	0.0799524	0.0694706	9.041	0	1	26.535	24.636	48
120	0.0641979	0.076537	7.8	0	2	27.776	25.877	48
121	0.0938763	0.0720379	4.099	0	4	31.477	29.578	48
122	0.0795363	0.0873859	6.567	1	3	29.009	27.11	48
123	0.0645873	0.0781737	16.874	0	1	31.036	35.507	49
124	0.0490287	0.0526289	12.022	0	3	35.888	40.359	49
125	0.0709883	0.0825325	15.463	1	2	32.447	36.918	49
126	0.0547168	0.0799543	13.584	0	1	22.249	23.805	50
127	0.0536352	0.0847205	11.466	0	2	24.367	25.923	50
128	0.0399122	0.048262	9.677	0	3	26.156	27.712	50
129	0.0387189	0.0502846	9.152	0	3	23.921	25.537	51
130	0.05507	0.0396888	4.278	0	4	28.795	30.411	51
131	0.0581784	0.0408166	14.073	1	1	19	20.616	51
132	0.0624711	0.0620664	11.514	1	2	21.559	23.175	51
133	0.0690617	0.0693695	5.898	0	2	24.006	30.283	52
134	0.112404	0.161132	6.989	1	1	22.915	29.192	52
135	0.0505307	0.0479361	4.564	1	3	25.34	31.617	52
136	0.0632061	0.0370487	12.313	0	3	22.337	28.162	53
137	0.0448885	0.0639011	6.565	0	4	28.085	33.91	53
138	0.0567485	0.0643126	18.329	1	1	16.321	22.146	53
139	0.0593089	0.0560308	14.842	1	2	19.808	25.633	53
140	0.0762057	0.063941	3.635	0	3	28.652	33.255	54
141	0.0535457	0.0359702	10.43	1	1	21.857	26.46	54
142	0.0621167	0.0485074	6.964	1	2	25.323	29.926	54
143	0.0648641	0.0465672	14.581	1	2	19.895	20.726	55
144	0.0706758	0.0456629	8.597	1	3	25.879	26.71	55
145	0.0429534	0.0515624	14.479	0	1	18.247	22.449	6
146	0.0544539	0.037436	13.284	1	2	19.442	23.644	6
147	0.0625731	0.0767727	10.071	1	3	22.655	26.857	6
148	0.0631226	0.0757863	13.726	0	2	25.643	29.821	7
149	0.0586941	0.0495775	17.032	1	1	22.337	26.515	7
150	0.0685599	0.069306	12.534	1	3	26.835	31.013	7
151	0.0516219	0.0704598	8.578	1	4	30.791	34.969	7
152	0.079045	0.0594582	8.654	0	4	41.784	35.458	8
153	0.041491	0.0447246	6.337	0	5	44.101	37.775	8
154	0.0699136	0.0563177	15.989	1	1	34.449	28.123	8
155	0.0895152	0.108138	14.002	1	2	36.436	30.11	8
156	0.0465479	0.0638503	13.427	1	3	37.011	30.685	8
157	0.0514953	0.0556698	14.254	0	1	26.367	25.348	9
158	0.0519008	0.0461415	10.413	1	2	30.208	30.189	9
159	0.047079	0.0618099	15.419	1	3	25.202	26.183	9
